# Supplementary material for: Open Access Capture of Patients With Gastroesophageal Reflux Disease Using an Online Patient-Reported Outcomes Instrument
Source: PubMed Central journal article supplement (PMC3626138; doi:10.2196/ijmr.2101), 2012-09-26
Supplement: ijmr_v1i5e7_app1.pdf [file ijmr_v1i5e7_app1.pdf]

Multimedia appendix: The GerdQ self-assessment questionnaire

Symptoms present in the last 7 days

|           |                                                                                                                                                        | Symptom presence |       |        |
|-----------|--------------------------------------------------------------------------------------------------------------------------------------------------------|------------------|-------|--------|
|           |                                                                                                                                                        | 0 days           | 1 day | 2 days |
| Question: |                                                                                                                                                        |                  |       |        |
| 1.        | How often did you have a burning feeling behind your breastbone (heartburn)?                                                                           | 0                | 1     | 2      |
| 2.        | How often did you have stomach contents (liquid or food) moving upwards to your throat or mouth (regurgitation)?                                       | 0                | 1     | 2      |
| 3.        | How often did you have a pain in the center of the upper stomach?                                                                                      | 3                | 2     | 1      |
| 4.        | How often did you have nausea?                                                                                                                         | 3                | 2     | 1      |
| 5.        | How often did you have difficulty getting a good night's sleep because of your heartburn and/ or regurgitation?                                        | 0                | 1     | 2      |
| 6.        | How often did you take additional medication for your heartburn and/ or regurgitation other than what the physician told you to take (such as Maalox)? | 0                | 1     | 2      |

GerdQ symptom scores:

GerdQ < 8: low probability for GERD

GerdQ ≥ 8 and ≤ 3 on questions 5 and 6 (impact questions): GERD with low impact on daily life

GerdQ ≥ 8 and ≥ 3 on questions 5 and 6 (impact questions): GERD with high impact on daily life
